# Supplementary material for: Enhancing Patient Understanding of Laboratory Test Results: Systematic Review of Presentation Formats and Their Impact on Perception, Decision, Action, and Memory
Source: J Med Internet Res. 2024 Aug 12;26:e53993. doi: 10.2196/53993 (PMC11347896; doi:10.2196/53993)
Supplement: Multimedia Appendix 3 [file jmir_v26i1e53993_app3.docx]

| Author (year) | Presentation format | | | | | | | | | | | | |
| --- | --- | --- | --- | --- | --- | --- | --- | --- | --- | --- | --- | --- | --- |
| Numerical | | Horizontal line bar | | | | | | Graph | | Video | Text only | Other |
| Reference range | Evaluative label | Colored blocks | Gradient coloring | Reference range | Evaluative label | Goal range | Harm anchors | Line graph | Triangle graph |
|  |  |  |  |  |  |  |  |  |  |  |  |  |  |
| Bar-Lev (2020) | x |  |  |  |  |  |  |  | x |  |  | x |  |
| Brewer (2012) | x |  | x |  |  |  |  |  |  |  |  |  |  |
| Elder (2012) | x | x | x |  |  |  |  |  | x | x |  | x |  |
| Fraccaro (2018) | x |  | x |  |  |  |  |  |  |  |  |  | Grouped presentation |
| Hohenstein (2018) | x | x |  |  | x |  |  |  |  |  |  |  |  |
| Kelman (2016) | x a | x a |  |  |  |  |  |  |  |  |  |  |  |
| Morrow (2017) |  |  |  |  |  |  |  |  |  |  | x |  |  |
| Morrow (2019) | x  x a | x a | x |  |  |  |  |  |  |  | x |  |  |
| Nystrom (2018) |  |  | x |  |  |  |  |  |  |  |  |  |  |
| Scherer (2018) | x |  | x |  |  |  | x |  |  |  |  |  |  |
| Struikman (2020) | x |  | x b |  |  | x b |  |  |  |  |  |  |  |
| Talboom-Kamp (2020) |  |  | x b |  |  | x b |  |  |  |  |  |  |  |
| Tao (2018) |  |  | x  x b  x c |  | x | x b  x c |  |  |  |  |  |  | Personalized informationc |
| Zarcadoolas (2013) | x | x |  |  |  |  |  |  |  |  |  |  |  |
| Zhang (2020) | x |  |  |  |  |  |  |  |  |  |  |  |  |
| Zhang (2021) |  |  | x d |  |  | x d |  | x d |  |  |  |  |  |
| Zikmund-Fisher (2017) | x |  | x | x | x |  |  |  |  |  |  |  |  |
| Zikmund-Fisher (2018) |  |  | x | x | x  x e |  |  | x e |  |  |  |  |  |

aNumerical display with both reference range and an evaluative label was combined into one studied variable.

bHorizontal line bars with both colored blocks and an evaluative label were combined into one studied variable.

cHorizontal line bars with colored blocks and personalized evaluative labels were combined into one studied variable.

dHorizontal line bars with colored blocks, an evaluative label and harm anchors were combined into one studied variable.

eHorizontal line bars with both reference ranges and harm anchors were combined into one studied variable.
